# Supplementary material for: A theoretical comparison of different third component content in ternary organic solar cells
Source: Royal Society of Chemistry journal article supplement (doi:10.1039/d4cp02120g), 2025-01-01
Supplement: d4cp02120g1.pdf [file d4cp02120g1.pdf]

## Supporting Information

### The theoretical comparison of different content of the third component in ternary organic solar cells

Ying Sun <sup>a</sup>, Li-Li Wang <sup>a</sup>, Jin-Hong Han <sup>a</sup>, Hai-Ping Zhou <sup>a</sup>, Qing-Qing Pan <sup>a,\*</sup>, Zhi-Wen Zhao <sup>b,\*</sup>, Xing-Man Liu <sup>c</sup>, Zhong-Min Su <sup>a,d,\*</sup>

<sup>a</sup>School of Chemistry and Environmental Engineering, Changchun University of Science and Technology, Jilin Provincial Science and Technology Innovation Center of Optical Materials and Chemistry, Jilin Provincial International Joint Research Center of Photo-functional Materials and Chemistry, Changchun, 130022, China

<sup>b</sup>School of Materials Science and Engineering, Changchun University of Science and Technology, Changchun, 130022, China

<sup>c</sup>School of Chemistry and Chemical Engineering, Ningxia University, Yinchuan 750021, China

<sup>d</sup>State Key Laboratory of Supramolecular Structure and Materials, Institute of Theoretical Chemistry, College of Chemistry, Jilin University, Changchun 130021, China

Correspondence should be addressed to Q. Pan ([panqq349@nenu.edu.cn](mailto:panqq349@nenu.edu.cn)) or Z. Zhao ([zhaozw@hbuas.edu.cn](mailto:zhaozw@hbuas.edu.cn))

or Z. Su ([zmsu@nenu.edu.cn](mailto:zmsu@nenu.edu.cn))

Number of pages: 16

Number of Figs: 8

Number of tables: 3

## Content

Simple introduction of General Amber Force Field and Marcus rate expression.

(Page S4)

Calculate interfragment charge transfer in electron excitation via interFragment Charge Transfer (IFCT).

(Page S5)

**Fig. S1.** Initial structure of **B1**, **Y7**, **BO-4Cl** molecule after optimization.

(Page S6)

**Fig. S2.** Process of MD simulations in **B1/Y7/BO-4Cl** blends and potential energy curve of the system at equilibrium in MD simulation. (The top group represents **B1:Y7 (10wt%):BO-4Cl** and the bottom group represents **B1:Y7 (50wt%):BO-4Cl**.)

(Page S6)

**Fig. S3.** The last step of NPT active layer snapshots and potential energy diagrams in **B1:Y7 (10wt%):BO-4Cl** and **B1:Y7 (10wt%):BO-4Cl**.

(Page S7)

**Fig. S4.** Proportion of different stacking patterns and stacking orientation for four group of binary complexes. ((a) is **B1:BO-4Cl-10wt%**, (b) is **B1:BO-4Cl-50wt%**, (c) is **B1:Y7-10wt%**, (d) is **B1:BO-4Cl-50wt%**.)

(Page S7)

**Fig. S5.** Probabilities of three stacking patterns at the D/A interface of the four groups of complexes.

(Page S8)

**Fig. S6.** CDD plots of the excited states  $S_1$ ,  $S_2$ ,  $S_3$  of the four groups of binary complexes and the corresponding FE or CT or LE states.

(Page S8)

**Fig. S7.** Distributions of FE ( $FE_D$  and  $FE_A$ ) and CT (FE/CT) states for the first twenty excited states of all binary complexes. ((a) for **B1:Y7 (10wt%):BO-4Cl** and (b) **B1:Y7 (50wt%):BO-4Cl**.)

(Page S8)

**Fig. S8.** (a) The ESP values of the donor and acceptor. (b) The ESP values of the vertical coordinate is the fragment of molecules, where the marked functional groups are the skeleton of donor, central core and IC of acceptors, respectively.

(Page S9)

**Table S1.** Relevant parameters of marcus theory.

(Page S9)

**Table S2.** Properties of binary complex with hot exciton mechanism.

(Page S10)

**Table S3.** Properties of binary complex with IEF mechanism.

(Page S12)

**Reference**

(Page S15)

**General Amber Force Field** : The general Amber force field (GAFF) uses 33 basic atom types and 22 special atom types covering almost all chemical spaces consisting of H, C, N, O, S, P, F, Cl, Br, and I.1 Based on more than thousands of optimizations and single-point calculations by researchers, it has been verified as a complete force field, available for all parameters of the basic atom types.<sup>1,2</sup> At present, it is widely used in the theoretical study of OSCs using GAFF for MD of the donor and acceptor, and the obtained data are consistent with the quantum calculations, which verifies the reliability of GAFF.<sup>3-7</sup>

**Marcus rate expression:** The charge transfer rate can be calculated by the semiempirical Marcus formula, Although we will follow convention in calling it Marcus theory<sup>8</sup>, the standard expression for non-adiabatic charge transfer between one donor D Although we will follow convention in calling it Marcus theory, the standard expression for non-adiabatic charge transfer between one donor D and one acceptor A was derived by Levich and Dogonadze:<sup>9,10</sup>

$$k = \left(\frac{4\pi^2}{h}\right) V_{DA}^2 \left(\frac{1}{\sqrt{4\pi T \lambda K_B}}\right) \exp\left[\frac{-(\Delta G + \lambda)^2}{4\lambda T K_B}\right]$$

Here, where  $h$  is Planck's constant,  $K_B$  is the Boltzmann constant,  $T$  with the temperature set to 298 K.  $V_{DA}$ , is D-A molecules interface electronic coupling,  $\lambda$  is recombination energy, including internal recombination ( $\lambda_{int}$ ) and external recombination energy ( $\lambda_{ext}$ ),  $\Delta G$  is Gibbs free energy difference during the charge separation and charge recombination process. Where  $\lambda$  is the reorganization energy,  $V_{DA}$  represents electronic coupling,  $\Delta G$  denotes the Gibbs free energy difference,  $h$  and  $k_B$  represent Planck and Boltzmann constants, respectively, and  $T$  is temperature.  $\lambda$  can be divided into internal recombination energy ( $\lambda_{int}$ ) and external recombination energy ( $\lambda_{ext}$ ),  $\lambda_{int}$  related to geometric changes to the donor and acceptor,  $\lambda_{ext}$  is influenced by the surrounding medium.<sup>10,11</sup> We used the adiabatic potential surfaces proposed by Sun to calculate  $\lambda_{int}$ .<sup>12</sup>

$$\lambda_{int} = \lambda_1(A) + \lambda_2(D) = [E(A^-) - E(A)] + [E(D) - E(D^+)]$$

Where  $E(A^-)$  and  $E(A)$  are the energies of the neutral acceptor at the anionic geometry and optimal ground-

state geometry, and  $E(D)$  and  $E(D^+)$  are the energies of the radical cation at the neutral geometry and optimal cation geometry.

The  $\lambda_{ext}$  can be defined by:<sup>13</sup>

$$\lambda_{ext} = \left( \frac{1}{4\pi\epsilon_0} \right) \Delta e^2 \left( \frac{1}{2a_1} + \frac{1}{2a_2} - \frac{1}{R} \right) \left( \frac{1}{\epsilon_{OP}} - \frac{1}{\epsilon_0} \right)$$

Where  $\epsilon_{op}$  and  $\epsilon_0$  are the optical dielectric and static dielectric constants, respectively,  $a_1$  and  $a_2$  are the effective radius of the donor and acceptor,  $R$  is the center distance between donor and acceptor.

$V_{DA}$  can be estimated by the generalized Mulliken-Hush (GMH) formalism as follows, which involves a vertical transition from the initial to the final state.<sup>14,15</sup>

$$V_{DA} = \frac{\Delta E \mu_{tr}}{\sqrt{(\Delta\mu)^2 + 4(\mu_{tr})^2}}$$

Where  $\mu_{tr}$  is the transition dipole moment between the ground state and the excited state,  $\Delta\mu$  is the difference of the dipole moment between two states, and  $\Delta E$  is the energy difference.

The Gibbs free energy difference in the processes of charge transfer and recombination can be approximate estimated by Rehm–Weller formula.<sup>16,17</sup>

$$\Delta G_{CS} = E_{EA}(A) - E_{IP}(D) - \Delta E_{S1} - \Delta E_b$$

$$\Delta G_{CR} = E_{IP}(D) - E_{EA}(A)$$

Where  $E_{EP}(A)$  and  $E_{IP}(D)$  correspond to the electron affinity of acceptor and ionization potential of donor, respectively, which can be calculated approximately by the HOMO energy level of donor and LUMO of acceptor,<sup>18</sup>  $\Delta E_{S1}$  is the energy of lowest excited state for the donor, and  $E_b$  is exciton binding energy. It's worth noting that the estimation of Gibbs free energy is related to the LUMO energy levels of individual donor and acceptor, which are still hard to get a precise value both in experimental and theoretical aspects.

### **Calculate interfragment charge transfer in electron excitation via interFragment Charge Transfer (IFCT):**

The IFCT method contains three steps: (i) Calculating atomic contribution to hole and electron. (ii) Calculating

fragment contributions to hole and electron by summing up atomic contributions. (iii) Constructing interfragment charge transfer matrix  $\mathbf{Q}$ . Its (R,S) element corresponds to the electron transfer from fragment R to fragment S during the excitation:

$$Q_{R,S} = \Theta_{R,\text{hole}} \Theta_{S,\text{ele}}$$

where  $\Theta_{R,\text{hole}}$  and  $\Theta_{S,\text{ele}}$  denote contribution of fragment R to hole and contribution of fragment S to electron, respectively. Above formula is very easy to comprehend, it essentially assumes that electron transfer from R to S is proportional to both composition of R in hole (where electron leaves) and composition of S in electron (where electron goes).

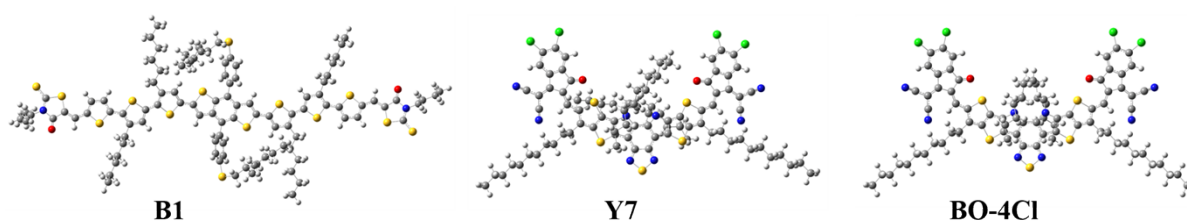

**Fig. S1.** Initial structure of **B1**, **Y7**, **BO-4Cl** molecule after optimization.

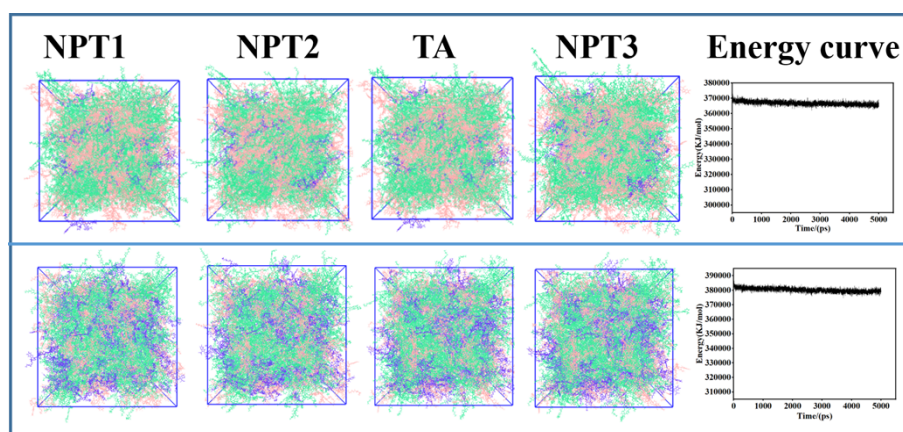

**Fig. S2.** Process of MD simulations in **B1/Y7/BO-4Cl** blends and potential energy curve of the system at equilibrium in MD simulation. (The top group represents **B1:Y7 (10wt%):BO-4Cl** and the bottom group represents **B1:Y7 (50wt%):BO-4Cl**.)

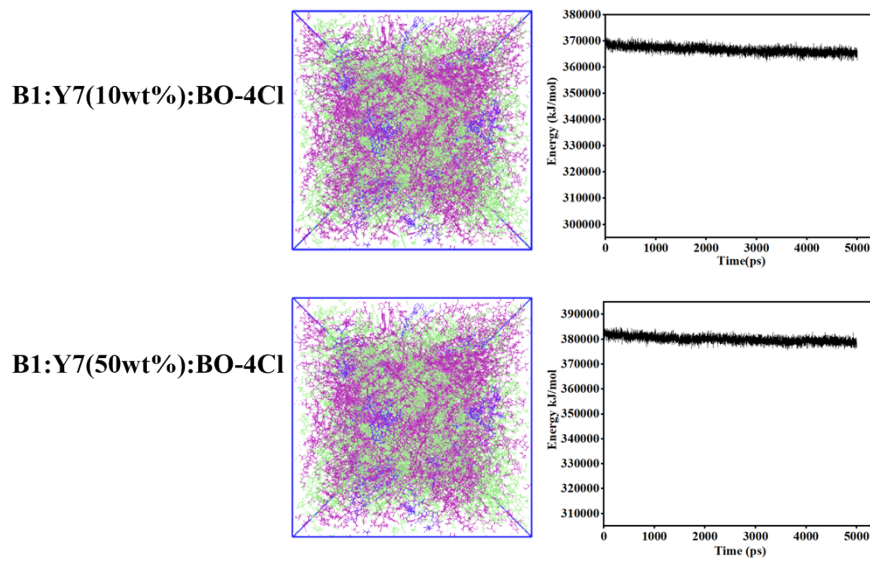

**Fig. S3.** The last step of NPT active layer snapshots and potential energy diagrams in **B1:Y7 (10wt%):BO-4Cl** and **B1:Y7 (50wt%):BO-4Cl**.

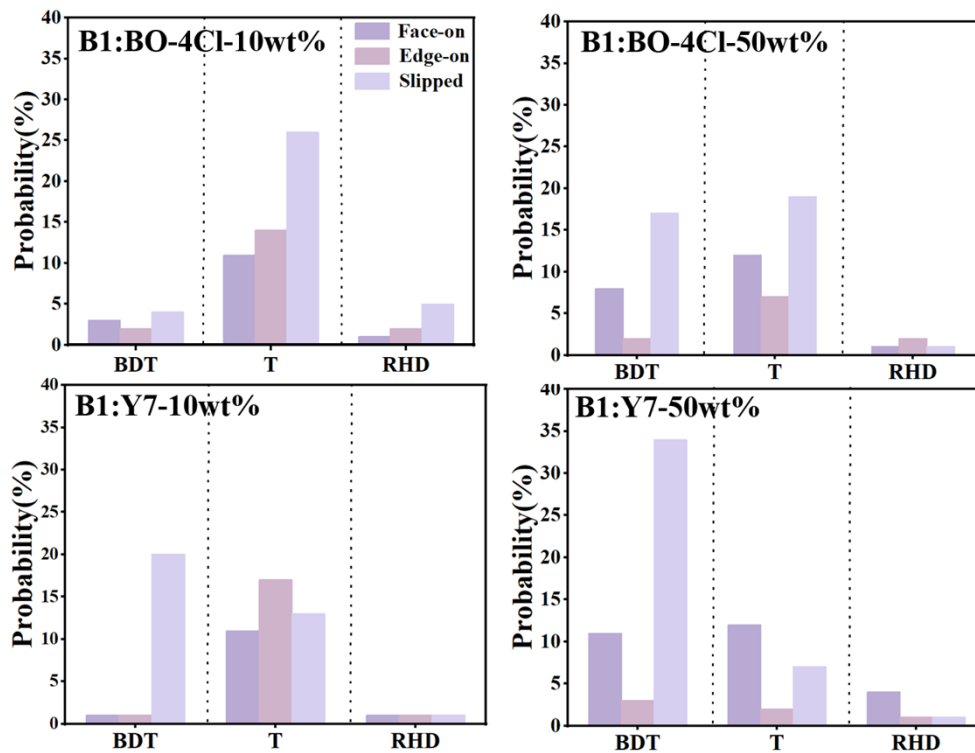

**Fig. S4.** Proportion of different stacking patterns and stacking orientation for four group of binary complexes. ((a) is **B1:BO-4Cl-10wt%**, (b) is **B1:BO-4Cl-50wt%**, (c) is **B1:Y7-10wt%**, (d) is **B1:BO-4Cl-50wt%**.)

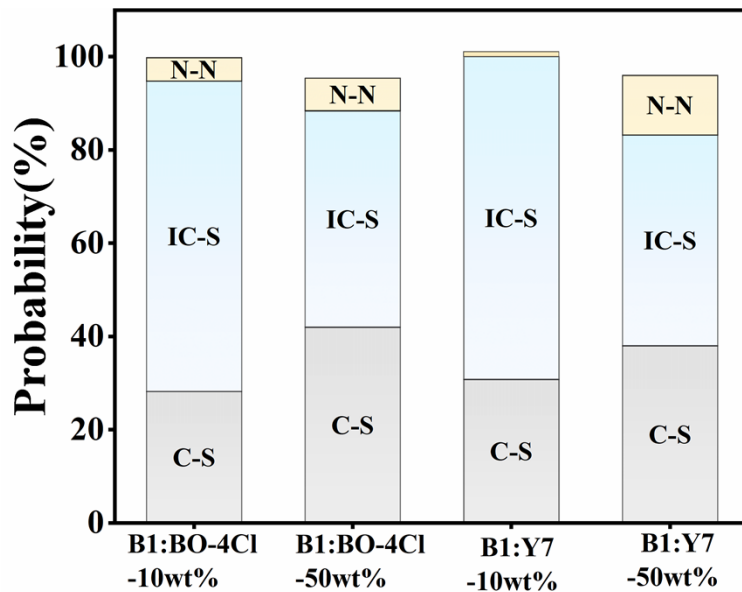

Fig. S5. Probabilities of three stacking patterns at the D/A interface of the four groups of complexes.

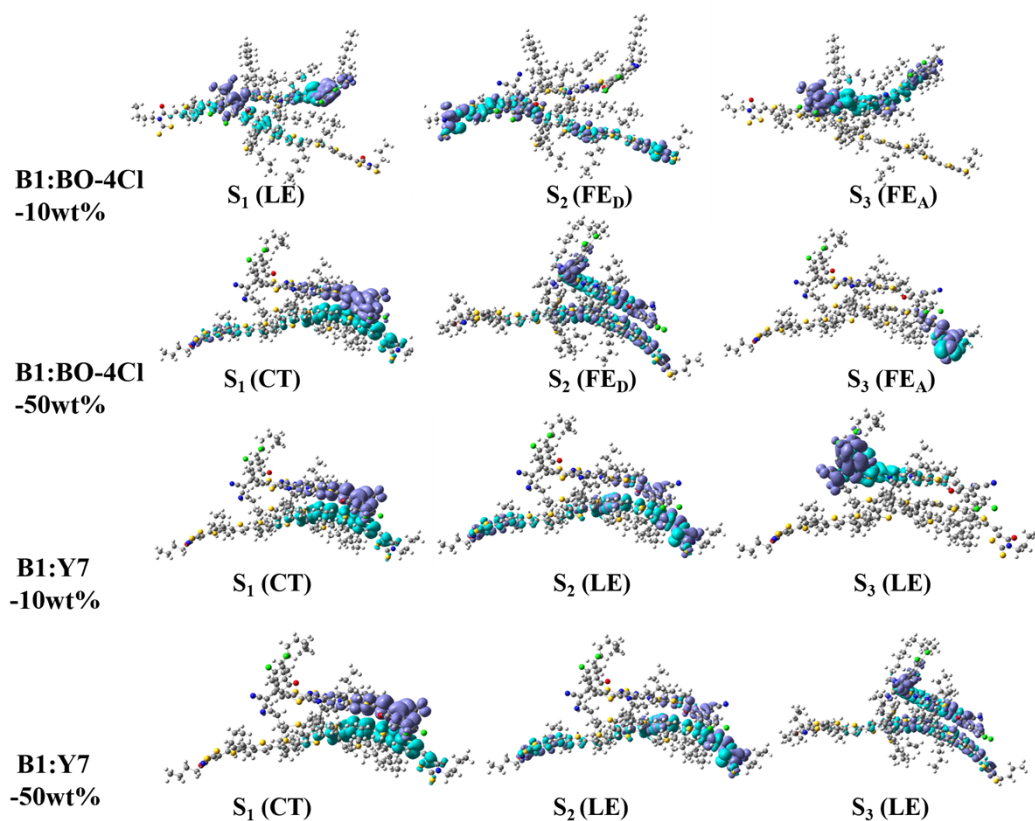

Fig. S6. CDD plots of the excited states  $S_1$ ,  $S_2$ ,  $S_3$  of the four groups of binary complexes and the corresponding FE or CT or LE states.



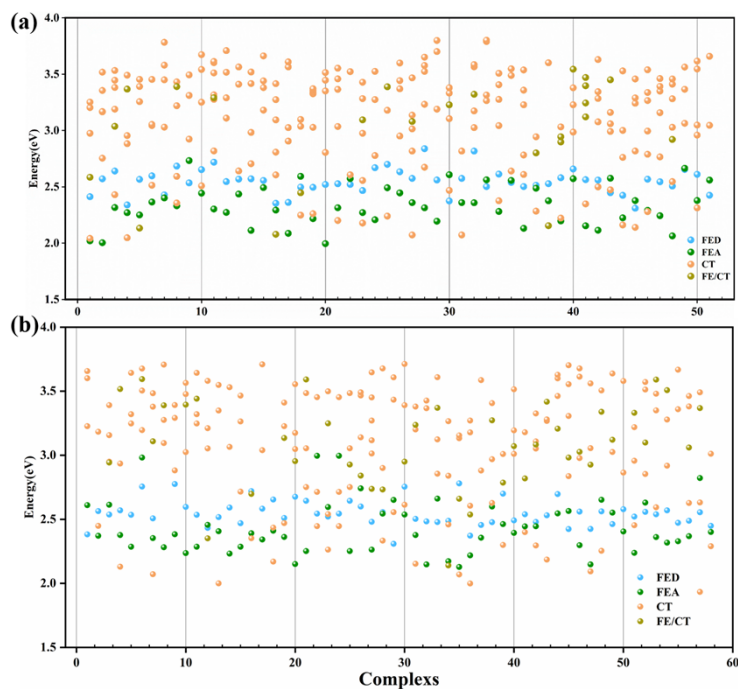

**Fig. S7.** Distributions of FE ( $FE_D$  and  $FE_A$ ) and CT ( $FE/CT$ ) states for the first twenty excited states of all binary complexes. ((a) for **B1:Y7 (10wt%):BO-4Cl** and (b) **B1:Y7 (50wt%):BO-4Cl**.)

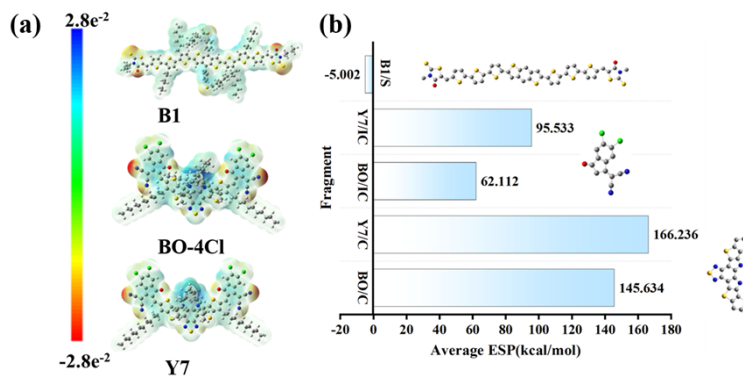

**Fig. S8.** (a) The ESP values of the donor and acceptor. (b) The ESP values of the vertical coordinate is the fragment of molecules, where the marked functional groups are the skeleton of donor, central core and IC of acceptors, respectively.

**Table S1.** Relevant parameters of marcus theory.

| System | $\lambda_{int}$ | $\lambda_{ext}$ | $\Delta G_{CS}$ |
|--------|-----------------|-----------------|-----------------|
|--------|-----------------|-----------------|-----------------|

---

**B1:BO-4Cl\_10wt%**

0.2936

0.2983

-0.7998

**B1:BO-4Cl\_50wt%**

**B1:Y7\_10wt%**

0.2934

0.3014

-0.7867

**B1:Y7\_50wt%**

---

**Table S2.** Properties of binary complex with hot exciton mechanism.

In **B1:BO-4Cl-10wt%**

---

| Complex | $E_{CT}$ (eV) | $f$    | $E_{FED}$ | $f$    | $E_{FED-CT}$ (eV) |
|---------|---------------|--------|-----------|--------|-------------------|
| 1       | 2.2839        | 0.0001 | 2.5138    | 3.0212 | 0.2299            |
| 2       | 2.1545        | 0.0067 | 2.6753    | 0.8697 | 0.5208            |
| 3       | 2.2483        | 0.1957 | 2.4971    | 2.8067 | 0.2488            |
| 4       | 2.5133        | 0.0002 | 2.5970    | 3.5948 | 0.0837            |
| 5       | 2.0417        | 0.0062 | 2.4123    | 3.0578 | 0.3706            |
| 6       | 2.3563        | 0.1877 | 2.6835    | 2.6163 | 0.3272            |
| 7       | 2.0473        | 0.0154 | 2.3391    | 3.4006 | 0.2918            |
| 8       | 2.1327        | 0.0001 | 2.5658    | 3.3676 | 0.4331            |
| 9       | 2.2340        | 0.0104 | 2.6730    | 3.022  | 0.4390            |
| 10      | 2.2395        | 0.0300 | 2.6994    | 3.5526 | 0.4599            |
| 11      | 2.6736        | 0.0009 | 2.8382    | 1.5224 | 0.1646            |
| 12      | 2.3084        | 0.0002 | 2.7527    | 2.9892 | 0.4443            |
| 13      | 2.0724        | 0.0142 | 2.5743    | 3.8286 | 0.5019            |
| 14      | 2.3759        | 0.0269 | 2.6131    | 3.2253 | 0.2372            |
| 15      | 2.2608        | 0.0002 | 2.4948    | 3.2470 | 0.2340            |

---

|    |        |        |        |        |        |
|----|--------|--------|--------|--------|--------|
| 16 | 2.2007 | 0.0704 | 2.5269 | 1.8833 | 0.3262 |
| 17 | 2.1780 | 0.1002 | 2.4664 | 3.3329 | 0.2884 |
| 18 | 2.5564 | 0.0000 | 3.1811 | 3.7566 | 0.6247 |
| 19 | 2.5020 | 0.0001 | 3.2649 | 0.4954 | 0.7629 |
| 20 | 2.0212 | 0.0003 | 2.9082 | 3.2102 | 0.887  |

In **B1:BO-4Cl-50wt%**.

| Complex | $E_{CT}$ (eV) | $f$    | $E_{FED}$ | $f$    | $E_{FED-CT}$ (eV) |
|---------|---------------|--------|-----------|--------|-------------------|
| 1       | 2.1293        | 0.1266 | 2.5697    | 2.6851 | 0.4404            |
| 2       | 2.0708        | 0.0677 | 2.5071    | 4.1227 | 0.4363            |
| 3       | 2.1697        | 0.0205 | 2.6541    | 3.0929 | 0.4844            |
| 4       | 2.1521        | 0.0003 | 2.5033    | 3.3038 | 0.3512            |
| 5       | 1.9994        | 0.1297 | 2.4173    | 2.5424 | 0.4179            |
| 6       | 2.4484        | 0.0442 | 2.5635    | 4.8593 | 0.1151            |
| 7       | 2.3521        | 0.0516 | 2.7199    | 2.924  | 0.3678            |
| 8       | 2.2629        | 0.0007 | 2.5438    | 3.1278 | 0.2809            |
| 9       | 2.4699        | 0.0316 | 2.811     | 0.7163 | 0.3411            |
| 10      | 2.3333        | 0.1344 | 2.5746    | 2.6688 | 0.2413            |
| 11      | 2.5556        | 0.1674 | 2.5776    | 2.5431 | 0.022             |

In **B1:Y7-10wt%**.

| Complex | $E_{CT}$ (eV) | $f$    | $E_{FED}$ | $f$    | $E_{FED-CT}$ (eV) |
|---------|---------------|--------|-----------|--------|-------------------|
| 1       | 2.3218        | 0.1962 | 2.5805    | 3.4179 | 0.2587            |
| 2       | 2.9662        | 0.0008 | 3.0460    | 2.9233 | 0.0798            |

|   |        |        |        |        |        |
|---|--------|--------|--------|--------|--------|
| 3 | 2.1613 | 0.1061 | 2.4244 | 2.8169 | 0.2631 |
| 4 | 2.4991 | 1.016  | 2.5599 | 2.3959 | 0.0608 |
| 5 | 2.3486 | 0.0286 | 2.5628 | 2.7652 | 0.2142 |
| 6 | 2.3126 | 0.0619 | 2.6106 | 3.9108 | 0.2980 |
| 7 | 2.2796 | 0.0009 | 2.5677 | 3.7010 | 0.2881 |
| 8 | 2.1400 | 0.0006 | 2.3097 | 0.8953 | 0.1697 |

In **B1:Y7-50wt%**.

| Complex | $E_{CT}$ (eV) | $f$    | $E_{FED}$ | $f$    | $E_{FED-CT}$ (eV) |
|---------|---------------|--------|-----------|--------|-------------------|
| 1       | 2.2538        | 0.0009 | 2.5618    | 2.8845 | 0.308             |
| 2       | 2.0926        | 0.0063 | 2.425     | 2.2810 | 0.3324            |
| 3       | 2.4595        | 0.7618 | 2.4885    | 3.0893 | 0.029             |
| 4       | 2.0696        | 0.0025 | 2.5802    | 0.7122 | 0.5106            |
| 5       | 1.9991        | 0.0185 | 2.3717    | 3.2079 | 0.3726            |
| 6       | 2.2999        | 0.0105 | 2.5998    | 3.1137 | 0.2999            |
| 7       | 2.2952        | 0.0301 | 2.4788    | 1.8589 | 0.1836            |
| 8       | 2.4535        | 0.1411 | 2.5205    | 3.3616 | 0.067             |
| 9       | 2.3349        | 0.1822 | 2.5801    | 2.4750 | 0.2452            |
| 10      | 2.2894        | 0.0000 | 2.4484    | 3.0038 | 0.159             |
| 11      | 2.3993        | 0.0000 | 2.5383    | 3.0682 | 0.139             |
| 12      | 2.3331        | 0.0614 | 2.4544    | 2.9269 | 0.1213            |

**Table S3.** Properties of binary complex with IEF mechanism.

In **B1:BO-4Cl-10wt%**.

| <b>Complex</b> | <b><math>E_{CT}</math> (eV)</b> | <b><math>f</math></b> | <b><math>E_{FED}</math></b> | <b><math>f</math></b> | <b><math>E_{FED-CT}</math> (eV)</b> |
|----------------|---------------------------------|-----------------------|-----------------------------|-----------------------|-------------------------------------|
| 1              | 2.3563                          | 0.1877                | 2.3314                      | 0.5088                | -0.0249                             |
| 2              | 2.5084                          | 0.0022                | 2.4432                      | 0.9673                | -0.0652                             |
| 3              | 2.6407                          | 0.0477                | 2.5683                      | 2.8024                | -0.0724                             |
| 4              | 2.2608                          | 0.0372                | 2.2168                      | 1.6384                | -0.0440                             |
| 5              | 3.1896                          | 0.0000                | 3.1181                      | 3.4150                | -0.0715                             |
| 6              | 2.4680                          | 0.0238                | 2.3744                      | 2.4579                | -0.0936                             |
| 7              | 3.0258                          | 0.0004                | 2.9665                      | 3.3238                | -0.0593                             |

In **B1:BO-4Cl-50wt%**.

| <b>Complex</b> | <b><math>E_{CT}</math> (eV)</b> | <b><math>f</math></b> | <b><math>E_{FED}</math></b> | <b><math>f</math></b> | <b><math>E_{FED-CT}</math> (eV)</b> |
|----------------|---------------------------------|-----------------------|-----------------------------|-----------------------|-------------------------------------|
| 1              | 2.4484                          | 0.0442                | 2.3705                      | 2.8845                | -0.0079                             |
| 2              | 3.0247                          | 0.0103                | 2.9921                      | 0.7263                | -0.0326                             |
| 3              | 2.6130                          | 2.7378                | 2.5371                      | 3.1137                | -0.0759                             |

In **B1:Y7-10wt%**.

| <b>Complex</b> | <b><math>E_{CT}</math> (eV)</b> | <b><math>f</math></b> | <b><math>E_{FED}</math></b> | <b><math>f</math></b> | <b><math>E_{FED-CT}</math> (eV)</b> |
|----------------|---------------------------------|-----------------------|-----------------------------|-----------------------|-------------------------------------|
| 1              | 2.5635                          | 0.0442                | 2.4484                      | 2.8593                | -0.0779                             |
| 2              | 2.5556                          | 0.0077                | 2.5073                      | 1.5031                | -0.0483                             |

In **B1:Y7-50wt%**.

| <b>Complex</b> | <b><math>E_{CT}</math> (eV)</b> | <b><math>f</math></b> | <b><math>E_{FED}</math></b> | <b><math>f</math></b> | <b><math>E_{FED-CT}</math> (eV)</b> |
|----------------|---------------------------------|-----------------------|-----------------------------|-----------------------|-------------------------------------|
| 1              | 2.5599                          | 1.0160                | 2.4991                      | 2.3959                | -0.0608                             |

|   |        |        |        |        |         |
|---|--------|--------|--------|--------|---------|
| 2 | 2.2241 | 0.1061 | 2.1613 | 2.8169 | -0.0628 |
| 3 | 2.2097 | 0.0026 | 2.1400 | 0.8953 | -0.0697 |
| 4 | 2.2917 | 0.0229 | 2.2796 | 0.7918 | -0.0121 |
| 5 | 2.3778 | 0.0619 | 2.3126 | 0.9177 | -0.0652 |

---

## References

1. J. Wang, R. M. Wolf, J. W. Caldwell, P. A. Kollman, D. A. Case, *J. Comput. Chem.*, 2004, 25, 1157-1174
2. G. C. Han, Y. Guo, X. Y. Ma, Y. P. Yi, *Sol. RRL.*, 2018, 2, 1800190
3. M. Y. Li, Y. Ren, J. C. Huang, M. Y. Sui, G. Y. Sun, Z. M. Su, *J. Mater. Chem. A.*, 2022, 10, 22477-22487
4. J. Yang, W. L. Ding, Q. S. Li, Z. S. Li, *J. Phys. Chem. Lett.*, 2022, 13, 916-922
5. Q. Q. Pan, S. B. Li, Y. C. Duan, Y. Wu, J. Zhang, Y. Geng, L. Zhao, Z. M. Su, *Phys. Chem. Chem. Phys.*, 2017, 19, 31227-31235
6. Z. Wang, G. C. Han, L. Y. Zhu, Y. Guo, Y. P. Yi, Z. G. Shuai, Z. X. Wei, *Phys. Chem. Chem. Phys.*, 2018, 20, 24570-24576
7. J. Yang, Q. S. Li, Z. S. Li, *Colloids Surf. A.*, 2023, 659, 130818
8. R. A. Marcus, *J. Chem. Phys.*, 1956, 24, 966
9. V. Levich and R. Dogonadze, *Dokl. Akad. Nauk. SSSR*, 1959, 124, 123-126
10. N.B. Taylor, I. Kassal, *Chemical Science*, 2018, 9 (11), 2942-2951
11. A. Burquel, V. Lemaure, D. Beljonne, R. Lazzaroni, J. Cornil, *J. Phys. Chem. A.*, 2006, 110, 3447-3453
12. V. Lemaure, M. Steel, D. Beljonne, J. L. Brédas, J. Cornil, *J. Am. Chem.*, 2005, 127, 6077-6086
13. Y. Z. Li, T. Pullerit, M.Y. Zhao, M.T. Sun, *J. Phys. Chem. C.*, 2011, 115, 21865-21873
14. Y. A. Duan, Y. Geng, H. B. Li, J. L. Jin, Y. Wu, Z. M. Su, *J. Comput. Chem.*, 2013, 34, 1611-1619
15. H. P. Hsu, *Acc. Chem. Res.*, 2009, 42, 509-518
16. A. A. Voityuk, *J. Chem. Phys.*, 2006, 124, 064505
17. V. M. Geskin, F. C. Grozema, L. D. A. Siebbeles, D. Beljonne, J. L. Brédas, J. Cornil, *J. Phys. Chem. B.*, 2005, 109, 20237-20243
18. P. K. Das, A. J. Muller, G. W. Griffin, I. R. Gould, C. H. Tung, N. J. Turro, *Photochem. Photobiol.*, 1984, 39, 281-285

19. X. Zhang, L. Chi, S. M. Ji, Y. B. Wu, P. Song, K. L. Han, H. M. Guo, T. D. James, J. Z. Zhao, *J. Am. Chem. Soc.*, 2009, 131, 17452-17463
